# Supplementary material
Source: PubMed Central journal article supplement (PMC3595996)
Supplement: NIHMS51880-supplement-supporting_info.pdf [file NIHMS51880-supplement-supporting_info.pdf]

## Supplemental Information

### Evolutionary and Functional Analyses of the

### Interaction between the Myeloid Restriction

### Factor SAMHD1 and the Lentiviral Vpx Protein

Nadine Laguette, Nadia Rahm, Bijan Sobhian, Christine Chable-Bessia, Jan Münch, Joke Snoeck, Daniel Sauter, William M. Switzer, Walid Heneine, Frank Kirchhoff, Frédéric Delsuc, Amalio Telenti, and Monsef Benkirane

## Supplemental Experimental Procedures

### Primate material and SAMHD1 sequencing

Predicted SAMHD1 coding sequences were retrieved from genome assembly projects on Ensembl (<http://www.ensembl.org/info/about/species.html>) for Human (GRCh37 of *Homo sapiens*), Chimpanzee (CHIMP2.1 of *Pan troglodytes*), Sumatran orangutan (PPYG2 of *Pongo abelii*), Gorilla (gorGor3.1 of *Gorilla gorilla*), Northern white-cheeked gibbon (Nleu1.0 of *Nomascus leucogenys*), Rhesus macaque (MMUL\_1 of *Macaca mulatta*), Common marmoset (C\_jacchus3.2.1 of *Callithrix jacchus*), Tarsier (tarSyr1 of *Tarsius syrichta*), Bushbaby (BUSHBABY1 of *Otolemur garnettii*), Gray mouse lemur (micMur1 of *Microcebus murinus*) and for Tree shrew (TREESHREW of *Tupaia belangeri*). SAMHD1 sequences were aligned and used to design specific primers in conserved regions of the 5' and 3' untranslated regions (UTRs) for PCR amplification.

Samples from NHPs were collected during their annual health surveys or at necropsy in accordance with each institution's animal care and use committee guidelines. Total RNA was extracted from tissue and cells from a panel of 25 primate species (Supplementary table 1) using Qiagen RNeasy Plus minikit. cDNA was prepared by reverse transcription using Transcriptor High Fidelity cDNA Synthesis Kit (Roche). Multiple independent PCRs were performed on cDNA with Pfx Supermix using primers in UTRs (Life Technologies) and subsequently sequenced. The PCR products were cloned into the pCR-BluntII-TOPO vector (Life Technologies) and several individual clones (n=5) were sequenced to identify allelic variants.

### Cell lines, transfections, transductions and infections

Adherent (HeLa and 293T) and suspension (THP-1 and U937) cells were cultured in DMEM or RPMI supplemented with 10% fetal calf serum (FCS), ultraglutamine and antibiotics. THP-1 cells silenced for endogenous SAMHD1 expression through shRNA were maintained in media supplemented with 1 µg/mL puromycin. All cell culture reagents were purchase from Lonza. U937 and THP-1 cells were differentiated overnight with 30ng/mL PMA (Sigma). Transfection of 293T cells was achieved using the standard phosphate calcium transfection protocol. HeLa cells were transfected using the jetPEI kit (Polyplus). Expression of SAMHD1 and Vpx in U937 and THP-1 cells was achieved through transduction with MLV particles. THP-1 cells were infected with 100ng equivalent of p24 of HIV-LUC-G.

### Virus production

Viral particles were produced from 293T cells using the standard phosphate calcium transfection protocol. Briefly, for HIV-LUC-G production, 293T cells were transfected with 8 $\mu$ g HIV-LUC and 2 $\mu$ g VSV-G encoding plasmid, for shRNA production 4 $\mu$ g shRNA construct, 4 $\mu$ g packaging plasmid, 2 $\mu$ g VSV-G encoding plasmid, for MLV transduction particles 5 $\mu$ g pOZ construct, 2.5 $\mu$ g packaging plasmid and 2.5 $\mu$ g A-MLV envelope encoding plasmid and for VLP-Vpx production, 8 $\mu$ g SIV3+ was co-transfected or not with 2 $\mu$ g VSV-G encoding plasmid. Media was replaced 16 hrs post transfection and viruses were harvested 24 hrs later, filtered at 0.45 $\mu$ m. When required, p24 concentration was measured by ELISA (Innogenetics).

#### **Cell extracts preparation and Western blot analysis**

Whole cell extracts were prepared with 0.5% triton, 150 mM NaCl, 10 mM KCL, 1.5 mM MgCl<sub>2</sub>, 0.5 mM EDTA 10 mM  $\beta$ -mercaptoethanol, 0.5 mM PMSF. Mouse anti-SAMHD1, and anti-DDB1 were purchased from Abcam. HA (11 clone 16B12) and Tubulin antibodies were from Covance/Eurogentec and Sigma, respectively.

A

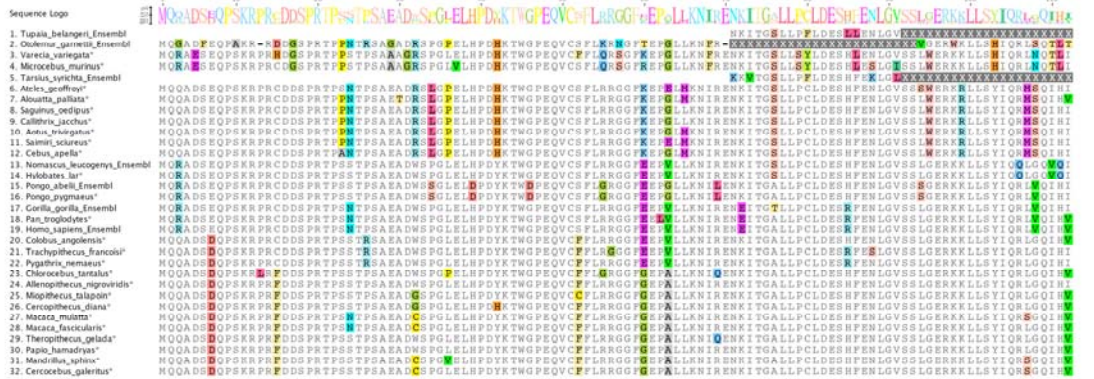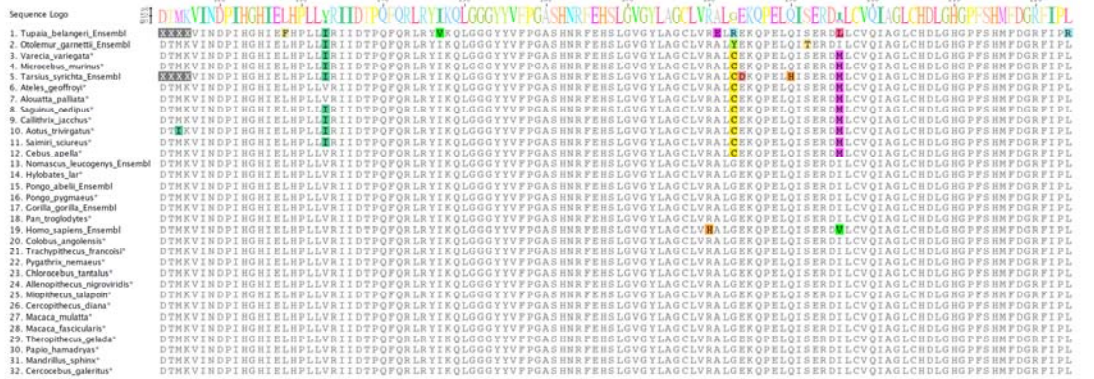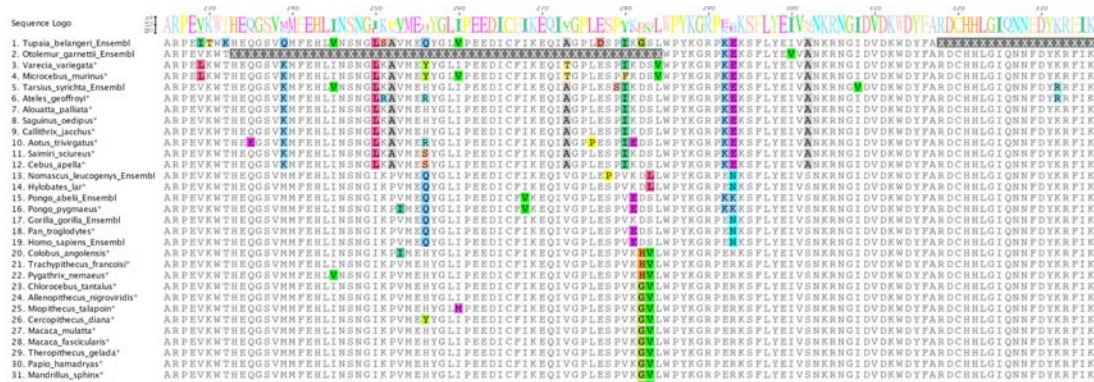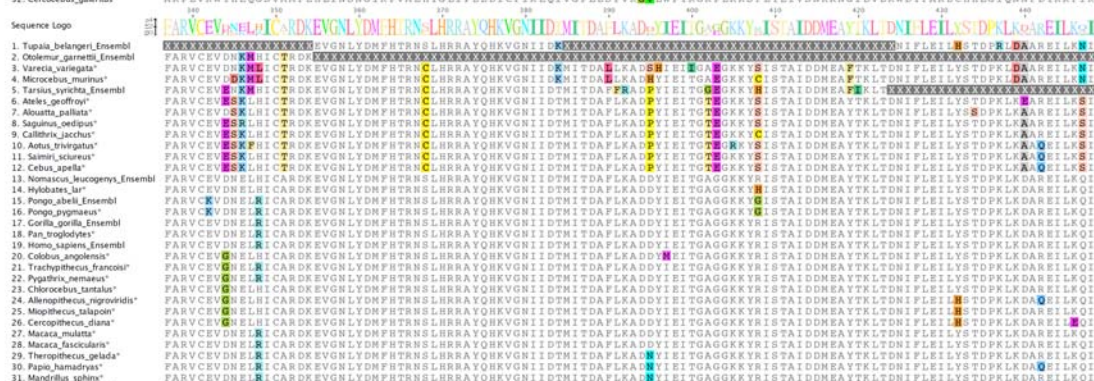



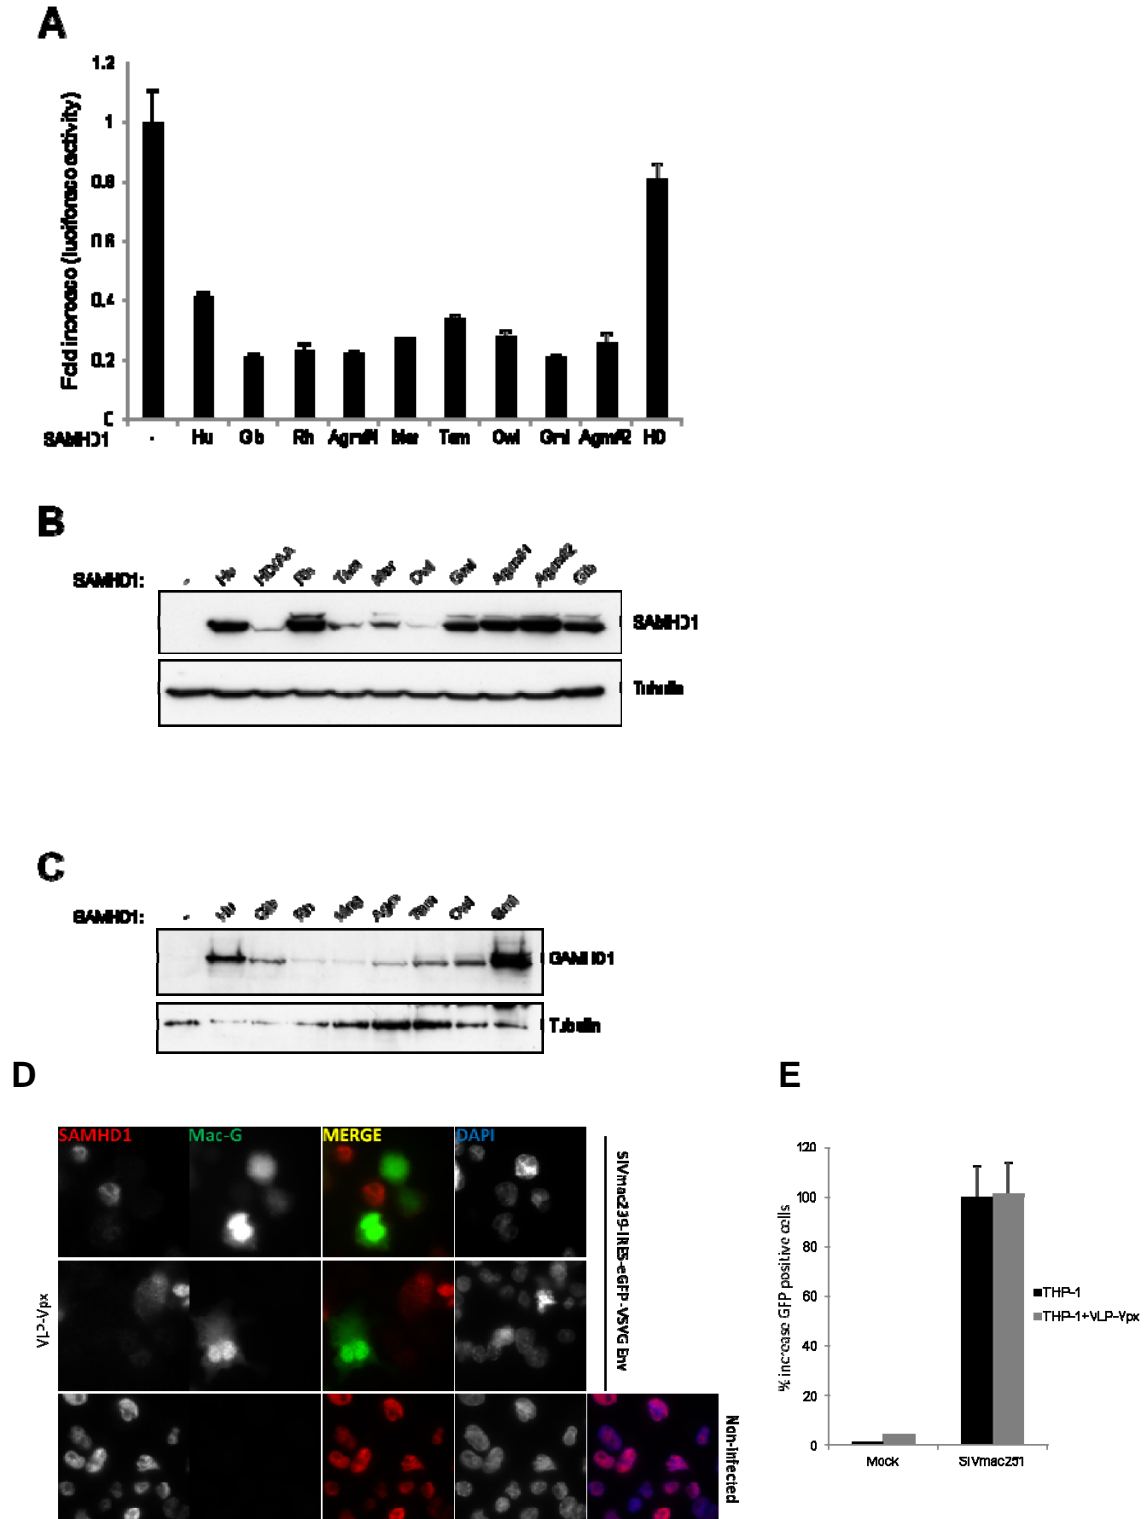

**Figure S2. Related to Figure 2**

(A) U937 cells were transduced with a retroviral vector allowing for expression of FLAG and HA tagged SAMHD1. 48hrs post transduction, cells were differentiated. Sixteen hours later transduced cells were infected with HIV-Luc-G. Luciferase activity was measured 24 hrs post

infection, normalized for protein concentration of analyzed samples. Results are presented as fold increase luciferase activity over parental U937 cells. (B) Cells from A were harvested and whole cell extracts were analyzed by WB with antibodies allowing for detection of SAMHD1, Tubulin and Vpx. (C) Cells from Figure 2 C were analyzed as in B. SIVmac251 infection causes huSAMHD1 degradation. (D) THP-1 cells were differentiated for 16hrs on polylysine-treated coverslips prior to infection with a VSV-G pseudotyped molecular clones of SIVmac251 harbouring an IRES-eGFP cassette as a reporter (mac-G). Cells were fixed 48hrs post infection and immunostained with anti-SAMHD1 antibody. Nuclei were DAPI-stained. (E) Flow cytometry analysis of cells from A. Results are presented as % of GFP positive cells in THP-1 cells. Error bars represent the standard deviation from the mean.



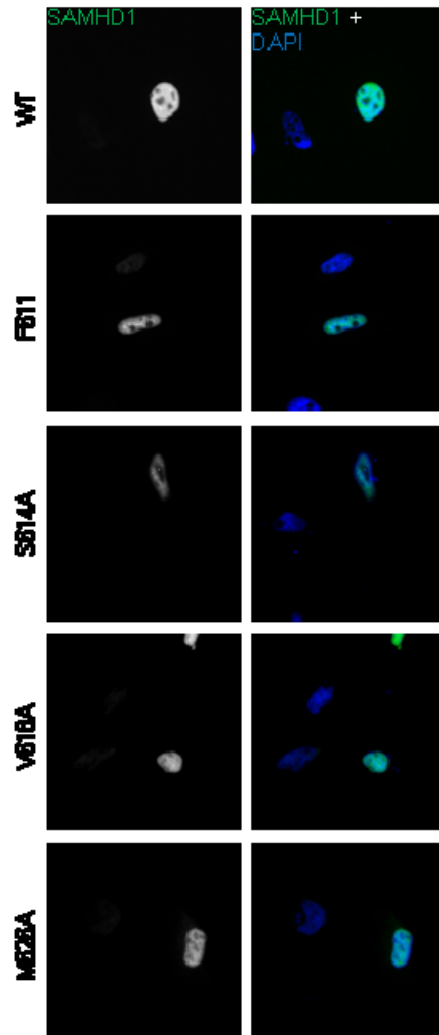

**Figure S4. Related to Figure 4**

Subcellular localization of huSAMHD1 mutants. HeLa cells were transfected with 250 ng of FLAG-tagged WT-huSAMHD1, SAMHD1-F611, SAMHD1-S614A, SAMHD1-V618A and SAMHD1M626A. Cells were fixed 48hrs post transfection and immunostained with anti-SAMHD1 antibody. Nuclei were stained with DAPI.



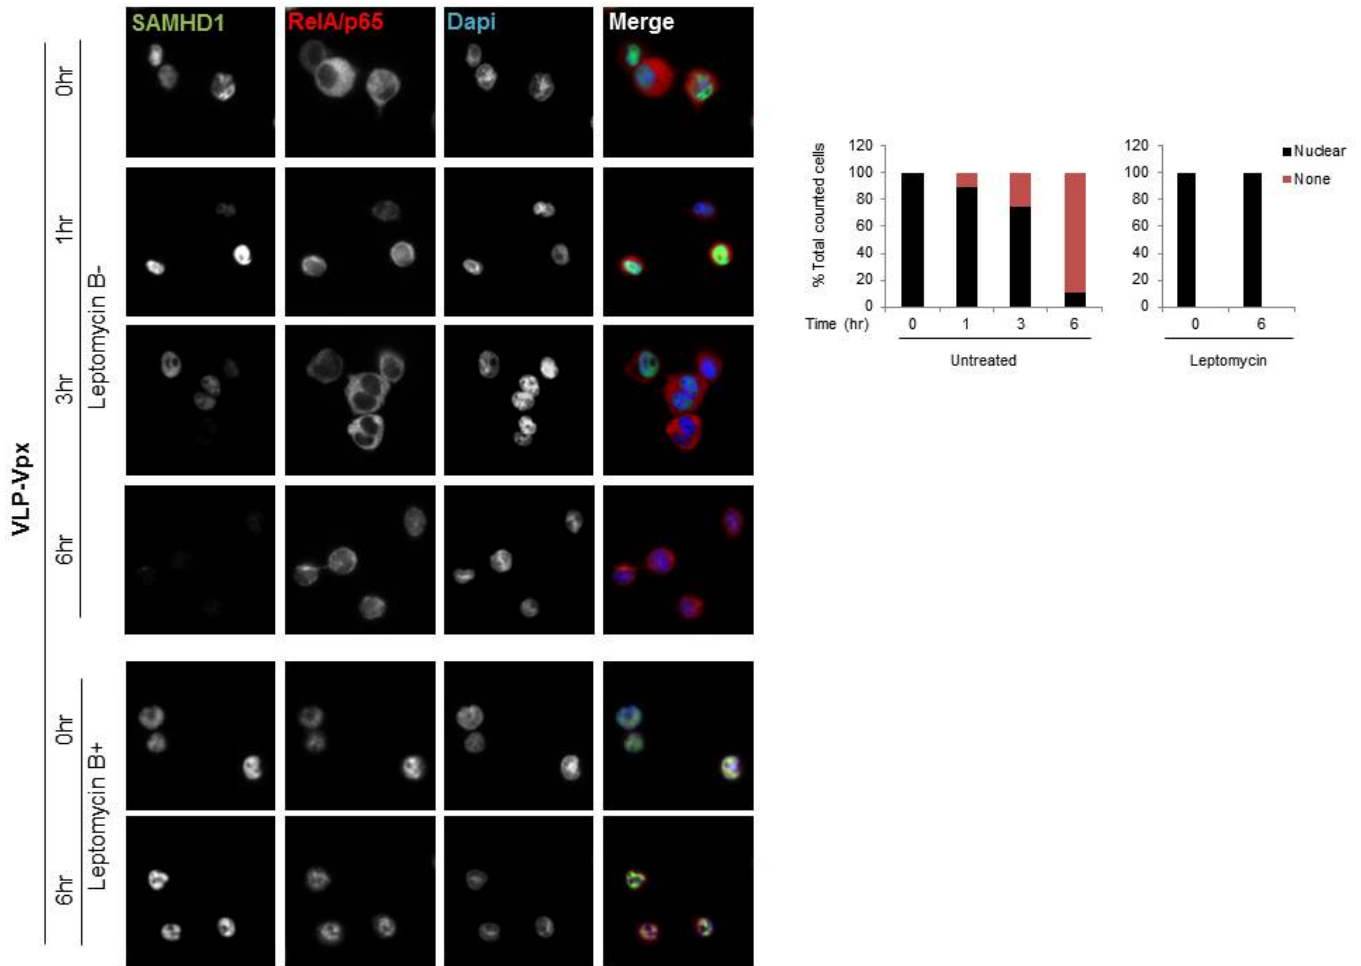

**Figure S5. Related to Figure 5**

Leptomycin B prevents SAMHD1 from degradation by Vpx. (Left panel) Differentiated THP1 cells were mock-treated or treated with Leptomycin B for 4 hrs. Mock-treated and Leptomycin B treated cells were incubated with VLP-Vpx for the indicated time. Cells were fixed and the expression of SAMHD1 and RelA/p65 was analyzed by immunofluorescence using specific antibodies. Nuclei were stained in mounting media with DAPI. (right panel) SAMHD1-positive cells from the left panel were counted. Results are expressed as %SAMHD1positive cells.

**Table S1. Accession Numbers of Primate *SAMHD1* Alleles, Related to Figure 1**

| <b>Taxonomy</b>                     | <b>Species</b>                           | <b>Common name</b>                  | <b>Cell type</b>              | <b>Accession number</b> |
|-------------------------------------|------------------------------------------|-------------------------------------|-------------------------------|-------------------------|
| <b>Hominoid</b>                     | <i>Pan troglodytes</i>                   | <i>Chimpanzee</i>                   | PBMC                          | JN936887                |
|                                     | <i>Pongo pygmaeus</i>                    | <i>Bornean orangutan</i>            | EB185(JC) lymphoblast line    | JN936888                |
|                                     | <i>Hylobates lar</i>                     | <i>White-handed gibbon</i>          | MLA-144 lymphoblast cell line | JN936889                |
| <b>Old World Monkeys</b>            | <i>Papio Hamadryas</i>                   | <i>Hamadryas baboon</i>             | 26-CB1 lymphoblast line       | JN936890                |
|                                     | <i>Chlorocebus tantalus</i>              | <i>African green monkey</i>         | COS-7 kidney cell line        | JN936891                |
|                                     |                                          |                                     |                               | JN936892                |
|                                     | <i>Macaca fascicularis</i>               | <i>Crab-eating macaque</i>          | CYNOMK-1 skin fibroblast      | JN936893                |
|                                     | <i>Macaca mulatta</i>                    | <i>Rhesus macaque</i>               | LLCMK-2 kidney cell line      | JN936894                |
|                                     | <i>Macaca mulatta</i>                    | <i>Rhesus macaque</i>               | FRhK-4 kidney cell line       | JN936895                |
|                                     | <i>Theropithecus gelada</i>              | <i>Gelada baboon</i>                | PBL                           | JN936896                |
|                                     | <i>Mandrillus sphinx</i>                 | <i>Mandrill</i>                     | PBL                           | JN936897                |
|                                     | <i>Cercocebus galeritus chrysogaster</i> | <i>Tana River mangabey</i>          | PBL                           | JN936898                |
|                                     |                                          |                                     |                               | JN936899                |
|                                     | <i>Allenopithecus nigroviridis</i>       | <i>Allen's swamp monkey</i>         | PBL                           | JN936900                |
|                                     | <i>Miopithecus talapoin</i>              | <i>Angolan talapoin</i>             | PBL                           | JN936901                |
|                                     | <i>Cercopithecus diana</i>               | <i>Diana monkey</i>                 | PBL                           | JN936902                |
|                                     | <i>Pygathrix nemaeus nemaeus</i>         | <i>Red shanked douc langur</i>      | PBL                           | JN936903                |
|                                     | <i>Trachypithecus francoisi</i>          | <i>Francois's langur</i>            | PBL                           | JN936904                |
| <i>Colobus angolensis palliatus</i> | <i>Angola colobus</i>                    | PBL                                 | JN936905                      |                         |
| <b>New World Monkeys</b>            | <i>Callithrix jacchus</i>                | <i>Common marmoset</i>              | liver                         | JN936906                |
|                                     | <i>Aotus trivirgatus</i>                 | <i>Northern owl monkey</i>          | OMK kidney cell line          | JN936907                |
|                                     | <i>Saguinus oedipus</i>                  | <i>Cotton-top tamarin</i>           | B95-8 kidney cell line        | JN936908                |
|                                     | <i>Saimiri sciureus</i>                  | <i>Squirrel monkey</i>              | PBL                           | JN936909                |
|                                     | <i>Cebus apella</i>                      | <i>Tufted capuchin</i>              | PBL                           | JN936910                |
|                                     | <i>Ateles geoffroyi</i>                  | <i>Black-handed spider monkey</i>   | PBL                           | JN936911                |
|                                     | <i>Alouatta villosa palliata</i>         | <i>Mantled howler</i>               | PBL                           | JN936912                |
|                                     |                                          |                                     |                               | JN936913                |
| <b>Lemurs</b>                       | <i>Varecia variegata variegata</i>       | <i>Black-and-white ruffed lemur</i> | PBL                           | JN936913                |
|                                     | <i>Microcebus murinus</i>                | <i>Gray mouse lemur</i>             | liver                         | JN936914                |

**Table S2. *vpx* Alleles from SIV and HIV-2 Strains, Related to the Experimental Procedures**

| Description  | Strains        | Species | Sequence                                           |                                                                                                                                                                                                                                                                                                                                                                       |
|--------------|----------------|---------|----------------------------------------------------|-----------------------------------------------------------------------------------------------------------------------------------------------------------------------------------------------------------------------------------------------------------------------------------------------------------------------------------------------------------------------|
| <b>SIV</b>   | SIVmac251 Vpx  | mac251  | Rhesus macaque<br><i>Macaca mulatta</i>            | ATGTCAGATCCCAGGGAGAGAATCCCACCTGGAACAGTGGAGAAGAGACAATAGGAGAGGCCCTTCGA<br>ATGGCTAAACAGAACAGTAGAGGAGATAAACAGAGAGGGCAGTAAACCACCTACCAAGGGAGCTGATTT<br>TCCAGGTTTGGCAAAGGCTTTGGGAATACTGGCATGATGAACAAGGGATGTCACAAAGCTATGTAAAAT<br>ACAGATACTTGTGTTTAATGCAAAAAGGCTTTATTTATGCATTGCAAGAAAGGCTGTAGATGTCTAGGGGA<br>AGGACACGGGGCAGGAGGATGGAGACCAGGACCTCCTCCTCCTCCCCCTCCAGGACTAGCATAA |
|              | SIVmac239 Vpx  | mac239  | Rhesus macaque<br><i>Macaca mulatta</i>            | ATGTCAGATCCCAGGGAGAGAATCCCACCTGGAACAGTGGAGAAGAGACAATAGGAGAGGCCCTTCGA<br>ATGGCTAAACAGAACAGTAGAGGAGATAAACAGAGAGGGCGTAAACCACCTACCAAGGGAGCTAATTT<br>TCCAGGTTTGGCAAAGGCTTTGGGAATACTGGCATGATGAACAAGGGATGTCACCAAGCTATGTAAAAT<br>ACAGATACTTGTGTTTAATACAAAAGGCTTTATTTATGCATTGCAAGAAAGGCTGTAGATGTCTAGGGGA<br>AGGACATGGGGCAGGGGGATGGAGACCAGGACCTCCTCCTCCTCCCCCTCCAGGACTAGCATAA   |
|              | SIVsmm Vpx     | PGm53   | Sooty mangabey<br><i>Cercocebus atys</i>           | ATGTCAGATCCCAGAGAGAGGATCCCACCTGGAACAGTGGAGAAGAAACAATAGGAGAGGCCATTTCGA<br>ATGGCTAAACAGAACAGTAGAAGAAATAAACAGGGCAGCAGTGAATCACTTGCAGGGAGCTAATTTT<br>CCAGGTTTGGCGAAGGCTTTGGGAATACTGGCGTGATGAAATGGGGATGTCAGAGAGCTACACAAAAT<br>ACAGATACTTGTGCTTAATACAGAAAGCTCTGTTTGTGCATTGCAAGAGAGGGGTGTAGGTGCTTAGGAG<br>AAGAGCATGGGGCAGGGGGATGGAGATCAGGGCCTCCTCCTCCTCCCCCTCCAGGACTAGCATAA   |
|              | SIVrcm-ng Vpx  | RCM.NG  | Red-capped mangabey<br><i>Cercocebus torquatus</i> | ATGGCAGAGGGGCAGAGAAAGAGTGGCAGAGGCCCCACTGGGGCTGGAGATGTAGAGTTTGCCCCCT<br>GGCTTACAGAAATGCTAACAGAAAGTCAACTTAGAAGCCAGGTTGCACCTTTCATCCAGAGTTCAATTTCC<br>GTCTGTGGCGTACTTGTGTGGAACACTGGCATGATAGGCTTGGAAAGAAGCCTTGAGTATGCAGGCTAT<br>AGATATCTGCTTCTGATGCAAAAAGCTCTGTTTATTCATTGCCAATCAGGGTGTTCAGAGACATGGAC<br>AGGGACAAGCAAGGGAAGCAGGAGAAAGAAATCCAGATTCTTCCGGGAATGTAA             |
|              | SIVmnd2 Vpx    | 5440    | Mandrill<br><i>Mandrillus</i>                      | ATGGCAGAGAGGGCACCAAGAGGGCCAGAAAGGAGCAGGAGAGGTAGGACTGGAGCAATGGCTGGAA<br>ACGTCACTGGAGAGAATCAACCGGGAGGCCCGGTTACACTTCCACCCAGAGTTCTTTCCGTCTCTG<br>GAACACATGTGTAGAACACTGGCATGATAGACATCAGAGATCTCTTGATTATGCCAAGTATAGATACCT<br>GCTGTTGATGCATAAGGCCATGTATACTCACATGCAACAGGGATGCCATGTAGAAATGGGCGCCCAA<br>GGGACCTCCTCCTCCAGGGATGGCTTAA                                             |
|              | SIVdrl1 Vpx    | FAO     | Drill<br><i>Mandrillus leucophaeus</i>             | ATGGCAGAAAGACAGTCACTGGAGAGAGCTCCAGCGGAGCCAATGGGAGCAGGAGAGGTAGAGTTAG<br>AAGATGGCTACAGAGGAGTCTCTTAAAGATCAACCAGGAGGCTCGATTACACTTCCACCCAGAGTTCC<br>TCTTCCGTCTTTGGAACACCTGCATGGAGCACTACCATGATGCTCTTCAGTTACTTTTTACTTACAGCAA<br>GTATAGATACCTACTTTTGTACAGAAGGCCATGTTTCATGCACCTTTCAGCAAGGATGCTCATGTCTGCAG<br>GGAAGGCATCCACCTCCCTCAGACCAGCAGGAGATAGACTTCTCCTCCTCCTCCTCCATGA     |
| <b>HIV-2</b> | HIV-2 ROD Vpx  | Rod     | Human<br><i>H. sapiens</i>                         | ATGACAGACCCAGAGAGACAGTACCACCAGGAAACAGCGGCGAAGAGACTATCGGAGAGGCCCTTCG<br>CCTGGCTAAACAGGACAGTAGAAGCCATAAACAGAGAAGCAGTGAATCACCTACCCCGAGAACTTATTT<br>TCCAGGTGTGGCAGAGGCTCCTGGAGATACTGGCATGATGAACAAGGGATGTCAGAAAGTTACACAAAG<br>TATAGATATTTGTGCATAATACAGAAAAGCAGTGTACATGCATGTTAGGAAAGGGTGTACTTGCCTGGGG<br>AGGGGACATGGGCCAGGAGGGTGGAGACCAGGGCCTCCTCCTCCTCCCCCTCCAGGTCTGGTCTAA |
|              | HIV-2A ROD Vpx | Rod     | Human<br><i>H. sapiens</i>                         | ATGACAGACCCAGAGAGACAGTACCACCAGGAAACAGCGGCGAAGAGACTATCGGAGAGGCCCTTCG<br>CCTGGCTAAACAGGACAGTAGAAGCCATAAACAGAGAAGCAGTGAATCACCTACCCCGAGAACTTATTT<br>TCCAGGTGTGGCAGAGGCTCCTGGAGATACTGGCATGATGAACAAGGGATGTCAGAAAGTTACACAAAG<br>TATAGATATTTGTGCATAATACAGAAAAGCAGTGTACATGCATGTTAGGAAAGGGTGTACTTGCCTGGGG<br>AGGGGACATGGGCCAGGAGGGTGGAGACCAGGGCCTCCTCCTCCTCCCCCTCCAGGTCTGGTCTAA |
|              | HIV-2B Vpx     | 7312    | Human<br><i>H. sapiens</i>                         | ATGGATCCCAGGGAGAGAGTGCACCAGGAAACAGCGACGAAGAGACAGTAGGAGAGGCCATTTCGCAT<br>GGCTAGAAAGAACAATAGTAGAATCAACAGGGGAAGCAGTCAACCATTTGCCCGGAGAACTTATTTTCC<br>AGGTCTGGCAAAGGCTTTGGGCATATTGGCGTGATGATCAGGGCATGTCAATTAGCTACACCAAGTATA<br>GGTACTTGCTTCTGATACAAAAGCAATGTTTGTACATTTTCAAAGGGCTGTACATGCCTGCGGGGAG<br>GCCATGGGCCAGGGGGATGGAGACGAGGACCTCCTCCTCCTCCTCCCCAGGGCTAGCCTAA        |
